# Supplementary material for: PCR and Culture Analysis of Streptococcus pneumoniae Nasopharyngeal Carriage in Healthy Children
Source: MDPI journal article supplement (doi:10.3390/microorganisms9102116), 2021-10-08
Supplement: s1 [file s1]

**Table S1.** The 37 Serotypes Detected by the CDC's *S. pneumoniae* qPCR Assay and Fluorescent Dye Associated with Each Probe.

| Fluorescent Dye | Reaction 1 | Reaction 2  | Reaction 3 | Reaction 4 | Reaction 5 | Reaction 6 | Reaction 7 |
|-----------------|------------|-------------|------------|------------|------------|------------|------------|
| Fam             | 19A        | 6CD         | 15AF       | 1          | 6ABCD      | 14         | 5          |
| Hex             | 3          | 22FA        | 33FA 37    | 16F        | 9VA        | 18CFBA     | 2          |
| Cy5             | 7FA        | 12FAB 44 46 | 23A        | 11AD       | 4          | 19F        | 23F        |

**Table S2.** Detection of Additional Serotypes by qPCR in Samples with Quellung Results Which Are Not Included in the 37-Serotype Molecular Assay.

| Year | Culture Serotype | PCR Serotypes <sup>a</sup> |
|------|------------------|----------------------------|
| 2016 | 23B              | 11AD, 4                    |
| 2016 | 15B              | 7FA                        |
| 2016 | 35B              | 5, 15AF                    |
| 2016 | 35B              | 3, 7FA, 22FA               |
| 2016 | 21               | 22FA, 5                    |
| 2016 | 15B              | 12FAB 44 46                |
| 2016 | 10A              | 4                          |
| 2016 | 21               | 12FAB 44 46                |
| 2016 | 19A              | NT                         |
| 2016 | 15B              | 5                          |
| 2016 | 7C               | 1                          |
| 2016 | 15B              | 16F, 4                     |
| 2016 | 15B              | 23A                        |
| 2016 | 23B              | 22FA                       |
| 2018 | 35B              | 7FA                        |
| 2018 | 23B              | 16F, 22FA                  |
| 2018 | 35F              | 11AD                       |
| 2018 | 15B              | 22FA                       |
| 2018 | 35B              | 4                          |
| 2018 | 21               | 4                          |
| 2018 | 15B              | 4                          |
| 2018 | 10A              | 5, 6AB                     |
| 2018 | 15C              | 11AD                       |
| 2018 | 35B              | 5                          |
| 2018 | 23B              | 33FA_37                    |
| 2018 | 21               | 5                          |
| 2018 | 15B              | 15AF                       |
| 2018 | 23B              | 22FA                       |
| 2018 | 15B              | 15AF                       |
| 2018 | 9N               | 4                          |
| 2018 | 15C              | 15AF                       |

<sup>a</sup> In the case of carriage by multiple serotypes, PCR serotypes/serogroups are separated by commas.

**Table S3.** Serotype Prevalence in Nasopharyngeal Samples Sent to NML, 2016 and 2018 combined. Samples Had Up to 4 Serotypes Co-carriage, All Serotypes are Counted.

|                       |                    | Culture 2016<br>( <i>n</i> = 682) | PCR 2016 ( <i>n</i> = 682) | Culture 2018<br>( <i>n</i> = 800) | PCR 2018 ( <i>n</i> = 300) <sup>a</sup> |
|-----------------------|--------------------|-----------------------------------|----------------------------|-----------------------------------|-----------------------------------------|
| Inclusion in Vaccines | Serotype           | <i>n</i> (%)                      | <i>n</i> (%)               | <i>n</i> (%)                      | <i>n</i> (%)                            |
| PCV7/PCV13            | 4                  | 0 (0.0)                           | 23 (3.4)                   | 0 (0.0)                           | 11 (3.7)                                |
| PCV7/PCV13            | 6ABCD <sup>b</sup> | 6A: 1 (1.4)                       | 4 (0.6)                    | 0 (0.0)                           | 15 (5.0)                                |

|                          |                     |                               |            |                                |           |
|--------------------------|---------------------|-------------------------------|------------|--------------------------------|-----------|
| PCV7/PCV13               | <b>9VA</b>          | 0 (0.0)                       | 1 (0.2)    | 0 (0.0)                        | 3 (1.0)   |
| PCV7/PCV13               | 14                  | 0 (0.0)                       | 0 (0)      | 0 (0.0)                        | 0 (0)     |
| PCV7/PCV13               | <b>18CFBA</b>       | 0 (0.0)                       | 2 (0.3)    | 0 (0.0)                        | 1 (0.3)   |
| PCV7/PCV13               | 19F                 | 1 (1.4)                       | 9 (1.3)    | 3 (4.4)                        | 6 (2.0)   |
| PCV7/PCV13               | 23F                 | 0 (0.0)                       | 2 (0.3)    | 0 (0.0)                        | 0 (0)     |
| PCV13                    | 1                   | 0 (0.0)                       | 9 (1.3)    | 0 (0.0)                        | 8 (2.7)   |
| PCV13                    | 3                   | 0 (0.0)                       | 13 (1.9)   | 0 (0.0)                        | 5 (1.7)   |
| PCV13                    | 5                   | 0 (0.0)                       | 16 (2.3)   | 0 (0.0)                        | 5 (1.7)   |
| PCV13-related type       | 6CD                 | 6C: 3 (4.2)                   | 8 (1.2)    | 6C: 1 (1.5)                    | 3 (1.0)   |
| PCV13                    | 7FA                 | 0 (0.0)                       | 7 (1.0)    | 0 (0.0)                        | 3 (1.0)   |
| PCV13                    | 19A                 | 1 (1.4)                       | 1 (0.2)    | 0 (0.0)                        | 0 (0)     |
| PPV23                    | <b>11AD</b>         | 11A: 4 (5.6)                  | 36 (5.3)   | 11A: 2(2.9)                    | 12 (4.0)  |
| PPV23                    | <b>12 FAB 44 46</b> | 0 (0.0)                       | 7 (1.0)    | 0 (0.0)                        | 11 (3.7)  |
| PPV23 (15B)              | 15BC                | 15B: 8 (11.3)<br>15C: 7 (9.9) | N/A        | 15B: 7 (10.3)<br>15C: 7 (10.3) | N/A       |
| PPV23                    | <b>22FA</b>         | 22F: 8 (11.3)                 | 34 (5.0)   | 22F: 2 (2.9)                   | 14 (4.7)  |
| PPV23                    | <b>33FA 37</b>      | 33F: 1 (1.4)                  | 4 (0.6)    | 33F: 1 (1.5)                   | 6 (2.0)   |
| NVT                      | 7C                  | 1 (1.4)                       | N/A        | 0 (0.0)                        | N/A       |
| NVT                      | 9N                  | 0 (0.0)                       | N/A        | 1 (1.5)                        | N/A       |
| NVT                      | 10A                 | 3 (4.2)                       | N/A        | 2 (2.9)                        | N/A       |
| NVT                      | 15AF                | 15A: 2 (2.8)                  | 18 (2.6)   | 15A: 5 (7.4)                   | 20 (6.7)  |
| NVT                      | 16F                 | 1 (1.4)                       | 6 (0.9)    | 2 (2.9)                        | 5 (1.7)   |
| NVT                      | 21                  | 7 (9.9)                       | N/A        | 7 (10.3)                       | N/A       |
| NVT                      | 23A                 | 2 (2.8)                       | 13 (1.9)   | 9 (13.2)                       | 16 (5.3)  |
| NVT                      | 23B                 | 8 (11.3)                      | N/A        | 5 (7.4)                        | N/A       |
| NVT                      | 34                  | 2 (2.8)                       | N/A        | 0 (0.0)                        | N/A       |
| NVT                      | 35B                 | 7 (9.9)                       | N/A        | 7 (10.3)                       | N/A       |
| NVT                      | 35F                 | 3 (4.2)                       | N/A        | 6 (8.8)                        | N/A       |
| Non-typeable by Quellung | NT                  | 1 (1.4)                       | N/A        | 0 (0.0)                        | N/A       |
| Not-typed by qPCR        | NT                  | N/A                           | 187 (52.1) | N/A                            | 94 (49.2) |
| Missing serotype         | Missing             | 0 (0.0)                       | N/A        | 1 (1.5)                        | N/A       |

<sup>a</sup> 300/800 samples were tested from 2018, all positives and a random sample of negatives. Only results from 300 samples are included. <sup>b</sup> The serotype from a serogroup that is contained in the vaccine is noted in bold.
